# Supplementary material for: Efficacy and Safety of Apatinib Plus Vinorelbine in Patients With Wild-Type Advanced Non–Small Cell Lung Cancer After Second-Line Treatment Failure: A Nonrandomized Clinical Trial
Source: PubMed Central journal article supplement (PMC7082721; doi:10.1001/jamanetworkopen.2020.1226), 2020-03-19
Supplement: jamanetwopen-3-e201226-s001.pdf [file jamanetwopen-3-e201226-s001.pdf]

1

2

## Protocol

3 **Main inclusion criteria:**

4 Age  $\geq 18$ , Pathologically identified non-small cell lung cancer

5 Adenocarcinoma, No-drive gene mutations (with EGFR, ALK, ROS1 included detected by next  
6 generation sequencing, NGS)

7 Squamous cell carcinoma, there is no need to perform gene detection but will be retrospectively  
8 detected by NGS

9 Progression disease after second line treatment

10 Patients have not been administrated with Vinorelbine or apatinib

11 PS score  $\leq 2$

12 Estimated survival time more than 3 months

13

14 **Main exclusion criteria:**

15 Patients received treatment of apatinib or Vinorelbine before

16 EGFR, ALK or ROS1 mutation positive for Lung Adenocarcinoma patients

17 EGFR, ALK or ROS1 mutation positive for Squamous cell carcinoma if the patients have  
18 performed gene detection by NGS

19 Patients with contraindication of chemotherapy

20 Pregnant or breast feeding women

21

22 **Outcome Measures:**

23 Primary Outcome: Objective Response Rate (ORR)

24 ORR means the best response status during the whole treatment line.

25 Secondary Outcome Measures: Progression free survival (PFS), OS (Overall survival) and safety

26

27 **Sample size calculation:**

28 We have chosen a fixed sample size of 30

29

30 **Statistical analysis:**

31 SPSS (version 22.0) was used for statistical analyses. Proportion of responders were calculated

32 with the 95% confidence intervals (CI) using the Clopper-Pearson method. Kaplan-Meier method

33 was used to estimate the median duration of response and PFS with corresponding 95% CIs.
