# Supplementary material for: Efficacy and Safety of Apatinib Plus Vinorelbine in Patients With Wild-Type Advanced Non–Small Cell Lung Cancer After Second-Line Treatment Failure: A Nonrandomized Clinical Trial
Source: PubMed Central journal article supplement (PMC7082721; doi:10.1001/jamanetworkopen.2020.1226), 2020-03-19
Supplement: jamanetwopen-3-e201226-s002.pdf [file jamanetwopen-3-e201226-s002.pdf]

## Supplementary Online Content

Zhang X, Xiong Y, Xia Q, et al. Efficacy and safety of apatinib plus vinorelbine in patients with wild-type advanced non–small cell lung cancer after second-line treatment failure: a nonrandomized clinical trial. *JAMA Netw Open*. 2020;3(3):e201226.  
doi:10.1001/jamanetworkopen.2020.1226

**eFigure 1.** Schematic Diagram of the 3-Dimensional Coculture-Based Clinical Trial

**eFigure 2.** Efficacy of Apatinib and Vinorelbine Guided by 3-Dimensional Coculture Platform

**eFigure 3.** Clinical Study Design

**eTable 1.** Drugs Included in the Screening Package

**eTable 2.** Baseline Characteristics of Patients Whose Tissues Were Used for the 3-Dimensional Coculture Assay For Drug Susceptibility

**eTable 3.** Treatment History of Each Patient

**eTable 4.** Treatment Duration

**eTable 5.** Adverse Events

This supplementary material has been provided by the authors to give readers additional information about their work.

**eFigure 1.** Schematic Diagram of the 3-Dimensional Coculture-Based Clinical Trial

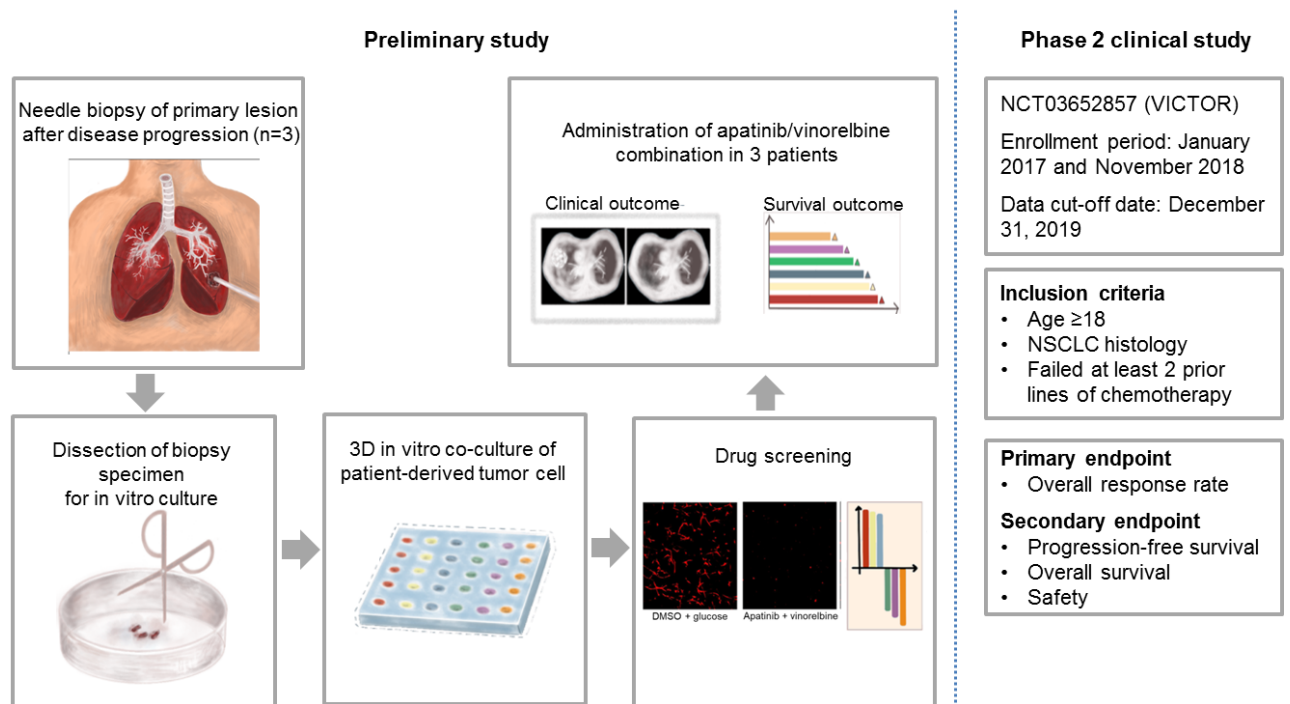

Apatinib and vinorelbine was identified from the 3D co-culture of patient-derived tumor cells obtained from lung tumor biopsy after disease progression. The biopsy specimen was dissected and 3D co-cultured with endothelial cells in culture plate containing growth media. Drug screening was performed using the patient-derived cells treated with indicated concentration of various drugs listed in Table S1. Based on the drug susceptibility test, apatinib and vinorelbine had the most potential in inhibiting the growth of tumor cells and was then administered to the three patients whose tumors were used for the drug screening. The clinical outcomes of the patients were observed prior to initiating the clinical trials for the combination therapy. The clinical trial (NCT03652857) enrolled 30 patients between January 2017 to November 2018 and had overall response rate as the primary endpoint and progression-free survival, overall survival, and safety as the secondary endpoints.

**eFigure 2.** Efficacy of Apatinib and Vinorelbine Guided by 3-Dimensional Coculture Platform

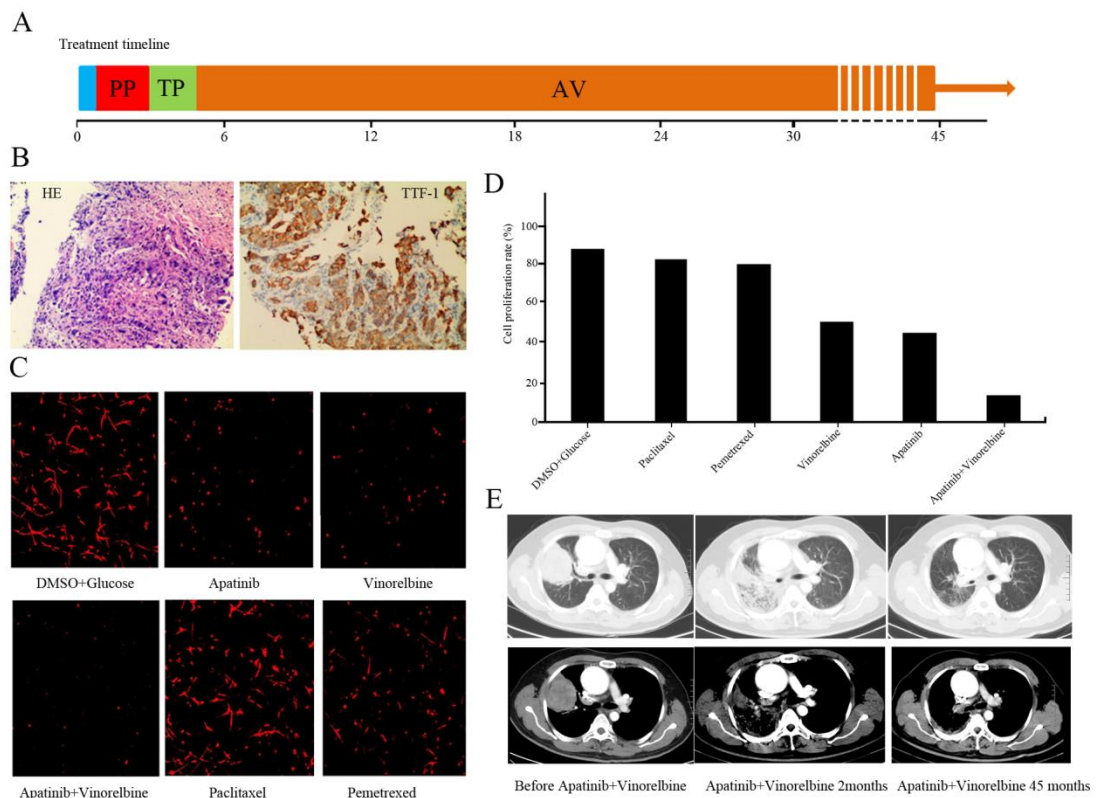

A. Illustration of the treatment timeline received by the male advanced lung adenocarcinoma patient (months). The patient received pemetrexed (PP) and paclitaxel (TP) plus platinum-based chemotherapy doublet regimen and apatinib plus vinorelbine (AV) as first-, second-, and third-line therapy, respectively. B. Micrographs of patient lung biopsy specimen showing the hematoxylin-eosin-staining (left) and immunohistochemistry (TTF-1, right) for histopathologic diagnosis of lung adenocarcinoma. C. Fluorescent micrographs demonstrating the potential of apatinib and vinorelbine combination in inhibiting the proliferation of lung tumor cells derived from the patient as compared to vehicle control (DMSO) or single agent inhibitors including apatinib, vinorelbine, paclitaxel or pemetrexed using the 3D co-culture platform. D. Bar graph illustrating the proliferation rate of patient-derived cells treated with indicated agents. E. CT radiographs demonstrating partial response of the patient to apatinib plus vinorelbine at 2 months from initiating the treatment and sustained response even until 45 months.

**eFigure 3.** Clinical Study Design

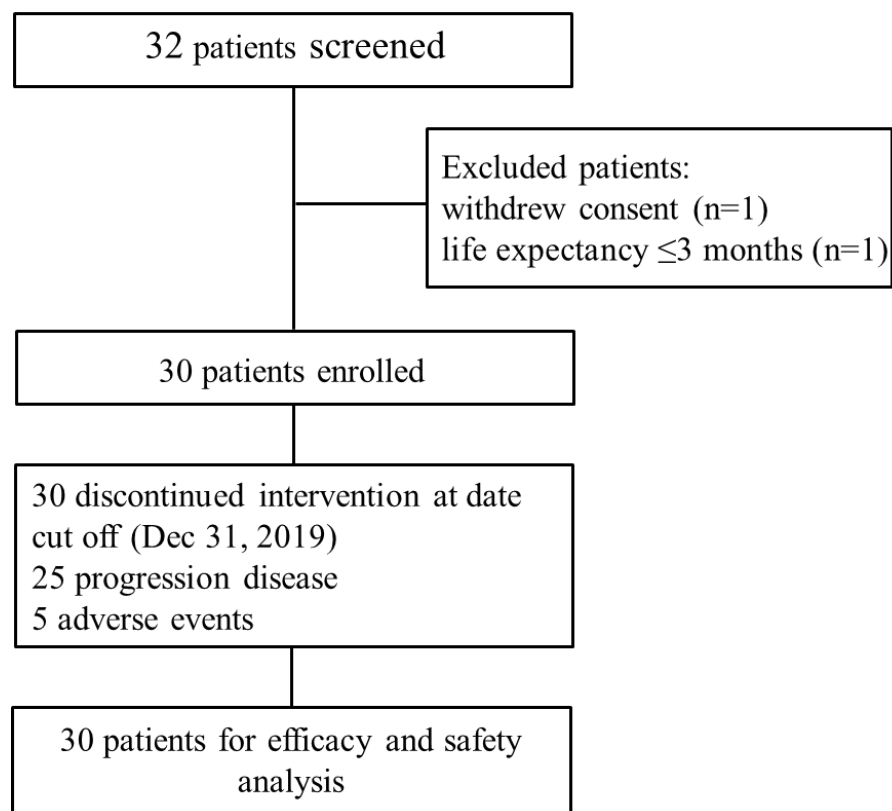

Flow diagram illustrating the clinical study design. A total of 32 patients with advanced non-small cell lung cancer (NSCLC) who were found to have no driver mutations and whose disease progressed from at least 2 lines of chemotherapy. Among them, 2 patients were excluded and 30 patients were included in the study. As of the data cut-off of Dec. 31, 2019; 25 patients discontinued the treatment due to disease progression and 5 patients discontinued due to intolerable adverse events. All patients were evaluated for efficacy and safety.

**eTable 1.** Drugs Included in the Screening Package

| <b>Monotherapy</b>  | <b>Combination therapy</b>        |
|---------------------|-----------------------------------|
| Vinorelbine         | Apatinib and vinorelbine          |
| Cisplatin           | Apatinib and docetaxel            |
| Carboplatin         | Apatinib and ALIMTA               |
| Gemcitabine         | Cisplatin and vinorelbine         |
| Etoposide Injection | Cisplatin and Etoposide Injection |
| Nimustine           | Cisplatin and vinblastinum        |
| Carmustine          | Cisplatin and eldisine            |
| ALIMTA              | Cisplatin and Gemcitabine         |
| Cyclophosphamide    | Cisplatin and Paclitaxel          |
| Glyciphosphoramide  | Paclitaxel and Gemcitabine        |
| Paclitaxel          | Carboplatin and Paclitaxel        |
| Doxifluridine       | Gemcitabine and docetaxel         |
| 5-Fluorouracil      | Carboplatin and Paclitaxel        |
| Mercaptopurine      |                                   |
| Cytarabine          |                                   |
| Tegafur             |                                   |
| Carmofur            |                                   |
| Hydroxyurea         |                                   |
| Methotrexate        |                                   |
| Ancitabine          |                                   |
| Dactinomycin        |                                   |
| Adriamycin          |                                   |
| Daunorubicin        |                                   |
| Epirubicin          |                                   |
| Mitomycin           |                                   |
| Peplomycin          |                                   |
| Pirarubicin         |                                   |
| Irinotecan          |                                   |
| Harringtonine       |                                   |
| Hydroxycamptothecin |                                   |
| Taxol               |                                   |
| Vincristine         |                                   |
| Vindesine sulfate   |                                   |
| Vinblastine         |                                   |
| Teniposide          |                                   |
| Atamestane          |                                   |

**eTable 2.** Baseline Characteristics of Patients Whose Tissues Were Used for the 3-Dimensional Coculture Assay For Drug Susceptibility

| Patient number | Age (years) | Sex  | Smoking history | ECOG PS | Clinical stage | Brain metastasis | Histology | Previous chemotherapy regimen | Driver oncogene mutation | Treatment line of apatinib plus vinorelbine | % maximum tumor reduction | ORR | PFS (months) | OS (months)       | Adverse event                 |
|----------------|-------------|------|-----------------|---------|----------------|------------------|-----------|-------------------------------|--------------------------|---------------------------------------------|---------------------------|-----|--------------|-------------------|-------------------------------|
| 1              |             | Male | Former smoker   | 1       | IV             | None             | Ad        | 2                             | Negative                 | 3L                                          | 95%                       | PR  | 45           | Ongoing treatment | Grade I Hand-foot syndrome    |
| 2              |             | Male | Former smoker   | 1       | IV             | None             | Ad        | 2                             | Negative                 | 3L                                          | 60%                       | PR  | 12           | 26                | Grade I Elevated transaminase |
| 3              |             | Male | Former smoker   | 1       | IV             | None             | Ad        | 2                             | Negative                 | 3L                                          | 45%                       | PR  | 15           | 27                | Grade II Hand-foot syndrome   |

**Abbreviations:** ECOG PS, Eastern Cooperative Oncology Group Performance Status; ORR, Objective response rate; PFS, progression-free survival; OS, overall survival; Ad, adenocarcinoma; nL, number of lines

**eTable 3.** Treatment History of Each Patient

| NO | First-line                         | Second-line                     | Third-line           | Fourth-line          | Fifth-line           | Sixth-line | History of surgery | History of radiotherapy |
|----|------------------------------------|---------------------------------|----------------------|----------------------|----------------------|------------|--------------------|-------------------------|
| 1  | Docetaxel+Nedaplatin               | Pemetrexed                      | vinorelbine+Apatinib |                      |                      |            | Yes                | none                    |
| 2  | Pemetrexed+Cisplatin               | Docetaxel                       | Tegafur              | vinorelbine+Apatinib |                      |            | none               | none                    |
| 3  | Pemetrexed+Cisplatin               | Endostatin+Docetaxel            | vinorelbine+Apatinib |                      |                      |            | none               | none                    |
| 4  | Gemcitabine+cisplatin              | Endostatin+Paclitaxel+Cisplatin | vinorelbine+Apatinib |                      |                      |            | none               | Yes                     |
| 5  | Pemetrexed+Cisplatin               | Docetaxel                       | vinorelbine+Apatinib |                      |                      |            | Yes                | Yes                     |
| 6  | Gemcitabine+cisplatin              | Paclitaxel                      | vinorelbine+Apatinib |                      |                      |            | Yes                | none                    |
| 7  | Docetaxel+Carboplatin              | Icotinib                        | vinorelbine+Apatinib |                      |                      |            | none               | none                    |
| 8  | Paclitaxel+Carboplatin             | Gemcitabine                     | vinorelbine+Apatinib |                      |                      |            | none               | none                    |
| 9  | Docetaxel+Carboplatin              | Gemcitabine                     | vinorelbine+Apatinib |                      |                      |            | Yes                | none                    |
| 10 | Pemetrexed+Cisplatin               | Docetaxel                       | vinorelbine+Apatinib |                      |                      |            | none               | none                    |
| 11 | Docetaxel+Cisplatin+Endostatin     | Pemetrexed+Carboplatin          | vinorelbine+Apatinib |                      |                      |            | none               | none                    |
| 12 | Pemetrexed+Nedaplatin              | nivolumab                       | vinorelbine+Apatinib |                      |                      |            | none               | none                    |
| 13 | Paclitaxel+Carboplatin+Endostatin  | Docetaxel                       | vinorelbine+Apatinib |                      |                      |            | none               | Yes                     |
| 14 | Pemetrexed+Carboplatin+Bevacizumab | Docetaxel+Bevacizumab           | vinorelbine+Apatinib |                      |                      |            | none               | none                    |
| 15 | Pemetrexed+Cisplatin               | Docetaxel                       | vinorelbine+Apatinib |                      |                      |            | none               | none                    |
| 16 | Pemetrexed+Cisplatin               | Paclitaxel+cisplatin            | Paclitaxel           | Gemcitabine          | vinorelbine+Apatinib |            | none               | none                    |
| 17 | Docetaxel+Carboplatin              | Pemetrexed                      | vinorelbine+Apatinib |                      |                      |            | none               | none                    |
| 18 | Pemetrexed+Carboplatin             | Docetaxel                       | vinorelbine+Apatinib |                      |                      |            | none               | none                    |
| 19 | Pemetrexed+Carboplatin             | Docetaxel                       | vinorelbine+Apatinib |                      |                      |            | Yes                | none                    |
| 20 | Gemcitabine+Nedaplatin             | Tegafur                         | vinorelbine+Apatinib |                      |                      |            | none               | none                    |
| 21 | Docetaxel+Carboplatin              | Pemetrexed                      | vinorelbine+Apatinib |                      |                      |            | none               | none                    |

|    |                        |                       |                      |             |         |                      |      |      |
|----|------------------------|-----------------------|----------------------|-------------|---------|----------------------|------|------|
| 22 | Pemetrexed+Cisplatin   | Docetaxel+Bevacizumab | vinorelbine+Apatinib |             |         |                      | none | none |
| 23 | Pemetrexed+Cisplatin   | Docetaxel             | Paclitaxel           | Gemcitabine | Tegafur | vinorelbine+Apatinib | Yes  | none |
| 24 | Pemetrexed+Bevacizumab | Docetaxel             | vinorelbine+Apatinib |             |         |                      | none | none |
| 25 | Paclitaxel+Carboplatin | Icotinib              | vinorelbine+Apatinib |             |         |                      | none | none |
| 26 | Paclitaxel+Carboplatin | Docetaxel             | vinorelbine+Apatinib |             |         |                      | none | none |
| 27 | Docetaxel+Cisplatin    | erlotinib             | vinorelbine+Apatinib |             |         |                      | none | none |
| 28 | Pemetrexed+Nedaplatin  | Gemcitabine           | vinorelbine+Apatinib |             |         |                      | none | none |
| 29 | Pemetrexed+Cisplatin   | Docetaxel             | vinorelbine+Apatinib |             |         |                      | none | none |
| 30 | Pemetrexed+Cisplatin   | Gemcitabine           | vinorelbine+Apatinib |             |         |                      | none | none |



**eTable 4.** Treatment Duration

| <b>Characteristics</b>                                            | <b>N=30, N(%)</b> |
|-------------------------------------------------------------------|-------------------|
| <b>Total duration of treatment cycles, [median(range), month]</b> | 4(1-22)           |
| <b>Duration of treatment administration</b>                       |                   |
| ≥ 8 months                                                        | 6(20.0%)          |
| ≥6months <8months                                                 | 3(10.0%)          |
| ≥4months <6months                                                 | 7(23.3%)          |
| ≥2months <4months                                                 | 4(13.3%)          |
| <2months                                                          | 10(33.3%)         |
| <b>No. of patients with dose reduction</b>                        | 13(43.3%)         |
| <b>Reasons for dose reduction (n=13)</b>                          |                   |
| Grade II-IV Hand-foot syndrome                                    | 8(61.5%)          |
| Grade II Leukopenia                                               | 1(7.7%)           |
| Grade II Proteinuria                                              | 1(7.7%)           |
| Grade II Elevated transaminase <sup>#</sup>                       | 1(7.7%)*          |
| Grade II Fungal infection                                         | 1(7.7%)           |
| Grade III Weakness                                                | 1(7.7%)           |
| <b>No. of patients who discontinued treatment</b>                 | 30(100%)          |
| <b>Reasons for treatment discontinuation</b>                      |                   |
| Grade III Weakness                                                | 1(3.3%)           |
| Grade III hand-foot syndrome*                                     | 2(6.7%)           |
| Accumulation of pleural effusion                                  | 1(3.3%)           |
| Fungal infection                                                  | 1(3.3%)           |
| Disease progression                                               | 25(83.3%)         |

Note: Hash(#) indicates the patient who still had grade II elevated transaminase even after rescue treatment, so following the principal investigator's advice, the patient reduce the apatinib dose to 250 mg once daily. Asterisk (\*) indicates the two patients who still had grade III hand-foot syndrome even after apatinib dose reduction. Hence, both patients discontinued treatment following the principal investigator's advice.

**eTable 5.** Adverse Events

| <b>Adverse events</b>         | <b>Grade I</b> | <b>Grade II</b> | <b>Grade III</b> | <b>Grade IV</b> | <b>Grade I-IV</b> | <b>Grade III or IV</b> |
|-------------------------------|----------------|-----------------|------------------|-----------------|-------------------|------------------------|
| <b>Hematologic (n=30)</b>     |                |                 |                  |                 |                   |                        |
| Leukopenia                    | 2(6.7%)        | 2(6.7%)         | 0(0%)            | 0(0%)           | 4(13.3%)          | 0(0%)                  |
| Neutrophil reduction          | 1(3.3%)        | 2(6.7%)         | 0(0%)            | 0(0%)           | 3(10.0%)          | 0(0%)                  |
| Anemia                        | 7(23.3%)       | 2(6.7%)         | 0(0%)            | 0(0%)           | 9(30.0%)          | 0(0%)                  |
| Thrombocytopenia              | 0(0%)          | 2(6.7%)         | 0(0%)            | 0(0%)           | 2(6.7%)           | 0(0%)                  |
| <b>Non-hematologic (n=30)</b> |                |                 |                  |                 |                   |                        |
| Hand-foot syndrome            | 8(26.7%)       | 5(16.7%)        | 5(16.7%)         | 1(3.3%)         | 19(63.3%)         | 6(20.0%)               |
| Proteinuria                   | 6(20%)         | 1(3.3%)         | 0(0%)            | 0(0%)           | 7(23.3%)          | 0(0%)                  |
| Hypertension                  | 2(6.7%)        | 1(3.3%)         | 0(0%)            | 0(0%)           | 3(10.0%)          | 0(0%)                  |
| Elevated transaminase         | 14(46.7%)      | 1(3.3%)         | 0(0%)            | 0(0%)           | 15(50.0%)         | 0(0%)                  |
| Elevated bilirubin            | 4(13.3%)       | 1(3.3%)         | 0(0%)            | 0(0%)           | 5(16.7%)          | 0(0%)                  |
| Decreased appetite            | 9(30.0%)       | 3(10.0%)        | 0(0%)            | 0(0%)           | 12(40.0%)         | 0(0%)                  |
| Diarrhea                      | 6(20.0%)       | 6(20.0%)        | 0(0%)            | 0(0%)           | 12(40.0%)         | 0(0%)                  |
